# Supplementary material
Source: PubMed Central journal article supplement (PMC3053960)
Supplement: 1100555108_pnas.201100555SI.pdf [file 1100555108_pnas.201100555SI.pdf]

# Supporting Information

de Boer et al. 10.1073/pnas.1100555108

## SI Text

The biochemical model of photosynthesis (1) requires three species-specific photosynthesis parameters (at 25 °C) to be known: maximum carboxylation capacity [ $V_{\text{cmax}25}$  ( $\text{mol}\cdot\text{m}^{-2}\cdot\text{s}^{-1}$ )], maximum rate of electron transport [ $J_{\text{max}25}$  ( $\text{mol}\cdot\text{m}^{-2}\cdot\text{s}^{-1}$ )] and mitochondrial respiration rate  $R_{\text{d}25}$  ( $\text{mol}\cdot\text{m}^{-2}\cdot\text{s}^{-1}$ ) (Table S2). For *Pinus taeda* (Pt) and *Taxodium distichum* (Td), we derived these values from published  $A/C_i$  curves (2) and the empirical relation among  $V_{\text{cmax}25}$ ,  $J_{\text{max}25}$ , and  $R_{\text{d}25}$  (3, 4):

$$J_{\text{max}25} = (29.1 + 1.64 \cdot 10^6 \cdot V_{\text{cmax}25}) \cdot 10^{-6} \quad [\text{S1}]$$

and

$$R_{\text{d}25} = 0.015 \cdot V_{\text{cmax}25} \quad [\text{S2}]$$

For the other species [*Acer rubrum* (Ar), *Ilex cassine* (Ic), *Myrica cerifera* (Mc), *Quercus laurifolia* (Ql), *Quercus nigra* (Qn), *Pinus elliottii* (Pe), and *Pinus taeda* (Pt)], we derived  $V_{\text{cmax}25}$  and  $J_{\text{max}25}$  from foliar nitrogen content (5) and  $R_{\text{d}25}$  from Eq. S2:

$$V_{\text{cmax}25} = 6.25 \cdot V_{\text{cr}} M_A N_m P_R \cdot 10^{-6}, \quad [\text{S3}]$$

where 6.25 is the ratio of weight of Rubisco to the weight of nitrogen in Rubisco ( $\text{g}\cdot\text{g}^{-1}$ ),  $V_{\text{cr}}$  is the specific activity of Rubisco at 25 °C [ $20.7$  ( $\mu\text{mol}\cdot\text{g}^{-1}\cdot\text{s}^{-1}$ )],  $M_A$  is the leaf mass ( $\text{g}\cdot\text{m}^{-2}$ ),  $N_m$  is leaf nitrogen content per leaf dry mass ( $\text{g}\cdot\text{g}^{-1}$ ) and  $P_R$  (-) is the fraction of nitrogen allocated to Rubisco, estimated at 0.15, and:

1. Farquhar GD, von Caemmerer S, Berry JA (2001) Models of photosynthesis. *Plant Physiol* 125:42–45.
2. Ellsworth DS, et al. (2004) Photosynthesis, carboxylation and leaf nitrogen responses of 16 species to elevated pCO<sub>2</sub> across four free-air CO<sub>2</sub> enrichment experiments in forest, grassland and desert. *Glob Change Biol* 10:2121–2138.
3. Wullschlegel SD (1993) Biochemical limitations to carbon assimilation in C3 plants—a retrospective analysis of the  $A/C_i$  curves from 109 species. *J Exp Bot* 44:907–920.
4. Baldocchi DD, Wilson KB (2001) Modeling CO<sub>2</sub> and water vapor exchange of a temperate broadleaved forest across hourly to decadal time scales. *Ecol Modell* 142:155–184.
5. Niinemets Ü, Tenhunen JD (1997) A model separating leaf structural and physiological effects on carbon gain along light gradients for the shade-tolerant species *Acer saccharum*. *Plant Cell Environ* 20:845–866.
6. Ainsworth EA, Rogers A (2007) The response of photosynthesis and stomatal conductance to rising [CO<sub>2</sub>]: Mechanisms and environmental interactions. *Plant Cell Environ* 30:258–270.
7. Franks PJ, Beerling DJ (2009) CO<sub>2</sub>-forced evolution of plant gas exchange capacity and water-use efficiency over the Phanerozoic. *Geobiology* 7:227–236.
8. Vose JM, et al. (1995) Vertical leaf area distribution, light transmittance, and application of the Beer-Lambert Law in four mature hardwood stands in the southern Appalachians. *Can J For Res* 25:1036–1043.

$$J_{\text{max}25} = 8.06 \cdot J_{\text{mc}} M_A N_m P_B \cdot 10^{-6}, \quad [\text{S4}]$$

where 8.06 is the minimal nitrogen investment in cytochrome bioenergetics [ $\mu\text{mol}$  of cytochrome·( $\text{g}$  of N)<sup>-1</sup>], the potential rate of photosynthetic electron transport per unit cytochrome ( $J_{\text{MC}}$ ) is estimated at 156  $\mu\text{mol}$  electrons·( $\mu\text{mol}$  of cytochrome·s)<sup>-1</sup> at 25 °C and  $P_B$  (g of N in cytochrome) is the fraction of N allocated to RuBP estimated at 0.035.

Down-regulation of the photosynthesis parameters  $V_{\text{cmax}25}$  and  $J_{\text{max}25}$  in response to rising CO<sub>2</sub> (6, 7) is simulated with an exponential decay function:

$$V_{\text{cmax}25}(CO_2) = V_{\text{cmax}25}(385) \cdot e^{-\kappa(CO_2 - 385)} \quad [\text{S5}]$$

and

$$J_{\text{max}25}(CO_2) = J_{\text{max}25}(385) \cdot e^{-\kappa(CO_2 - 385)}, \quad [\text{S6}]$$

where  $V_{\text{cmax}25}(385)$  and  $J_{\text{max}25}(385)$  represent the photosynthesis parameters  $V_{\text{cmax}25}$  and  $J_{\text{max}25}$  at their present day values (Table S2) and  $\kappa$  is a decay constant for the CO<sub>2</sub> response of  $V_{\text{cmax}25}$  and  $J_{\text{max}25}$ . A value of  $2 \cdot 10^{-4}$  ppm<sup>-1</sup> is chosen for  $\kappa$  to match estimated down-regulation of photosynthesis parameters at geological timescales (7). Furthermore, species specific values of leaf area index [LAI (-)] are derived from literature (Table S2) (8, 9).

9. Liu S, Riekerk H, Gholz H (1997) Leaf litterfall, leaf area index, and radiation transmittance in cypress wetlands and slash pine plantations in north-central Florida. *Wetlands Ecol Manage* 4:257–271.
10. Clark KL, Gholz HL, Castro MS (2004) Carbon dynamics along a chronosequence of slash pine plantations in North Florida. *Ecological Applications* 14:1154–1171.
11. Powell TL, et al. (2008) Carbon exchange of a mature, naturally regenerated pine forest in north Florida. *Glob Change Biol* 14:2523–2538.
12. Franks PJ, Beerling DJ (2009) Maximum leaf conductance driven by CO<sub>2</sub> effects on stomatal size and density over geologic time. *Proc Natl Acad Sci USA* 106:10343–10347.
13. Williams M, et al. (1996) Modelling the soil-plant-atmosphere continuum in a *Quercus* & *Acer* stand at Harvard Forest: The regulation of stomatal conductance by light, nitrogen and soil/plant hydraulic properties. *Plant Cell Environ* 19:911–927.
14. Saha AK, Sternberg LDSLO, Miralles-Wilhelm F (2009) Linking water sources with foliar nutrient status in upland plant communities in the Everglades National Park, USA. *Ecohydrology* 2:42–54.
15. Moorhead KK, McArthur J (1996) Spatial and temporal patterns of nutrient concentrations in foliage of riparian species. *Am Midl Nat* 136:29–41.

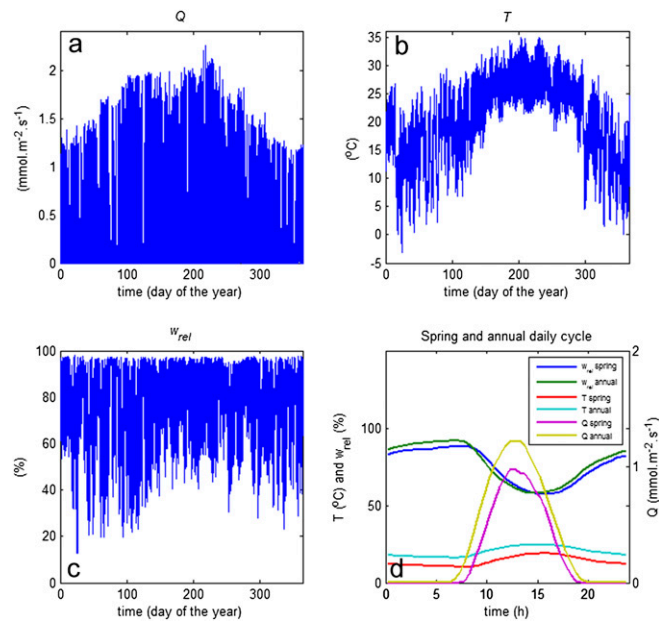

**Fig. S1.** Environmental boundary conditions used to force stomatal adaptation models. Annual cycles of climatic boundary conditions of photosynthetic active radiation [ $Q$  ( $\text{mmol}\cdot\text{m}^{-2}\cdot\text{s}^{-1}$ )] (A), ambient air temperature [ $T$  ( $^{\circ}\text{C}$ )] (B), and relative humidity [ $w_{rel}$  (%)] (C) measured over a pine flatwoods ecosystem near Gainesville, FL, during the year 2003 (10, 11). (D) Average diurnal cycles for  $Q$ ,  $T$ , and  $w_{rel}$  during leaf development (March, April, and May) are prescribed to the optimization model to determine  $g_{s,max}$ . Annual average diurnal cycles of these boundary conditions are prescribed to calculate gas exchange at the leaf level. A complete annual cycle of these boundary conditions is prescribed to calculate changes in annual canopy transpiration.

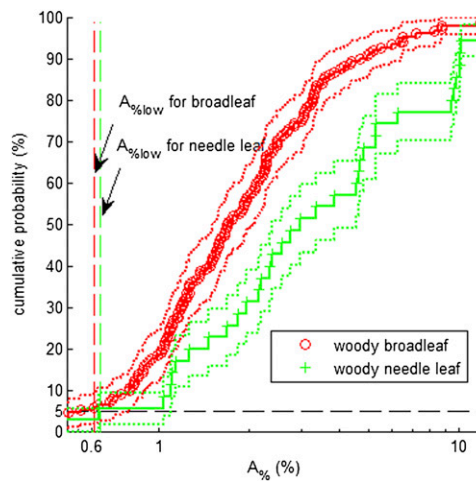

**Fig. S2.** Empirical cumulative probability of  $A_{\%}$  for woody broadleaf and woody needle leaf species. Data are from Franks and Beerling (12). Red circles and green crosses denote data points; dotted red and green lines denote the fit of the empirical distribution together with their 95% confidence levels. Dashed red and green lines denote the lower 5% limit of  $A_{\%}$ . On average, stomata occupy less space on leaves of woody broadleaf species than on leaves (needles) of woody needle leaf species. However, the 5% lower limit of  $A_{\%}$  (defined as  $A_{\%low}$ ) for both distributions cannot be distinguished. Note that a logarithmic x axis is used.

**Table S1. Species specific relations between pore length and guard cell width**

| Species                   | Mean $C_w$ , $\mu\text{m}$ | $\sigma$ , $\mu\text{m}$ | $n$ | Linear regression           | $r^2$ |
|---------------------------|----------------------------|--------------------------|-----|-----------------------------|-------|
| <i>Acer rubrum</i>        | 6.79                       | 0.94                     | 36  | $C_w = 0.36 \cdot L + 2.90$ | 0.49* |
| <i>Ilex cassine</i>       | 10.26                      | 1.33                     | 27  | $C_w = 0.28 \cdot L + 6.19$ | 0.57* |
| <i>Myrica cerifera</i>    | 7.84                       | 1.10                     | 25  | $C_w = 0.41 \cdot L + 3.57$ | 0.62* |
| <i>Pinus elliotii</i>     | 16.24                      | 2.22                     | 28  | $C_w = 0.27 \cdot L + 6.66$ | 0.62* |
| <i>Pinus taeda</i>        | 11.51                      | 1.22                     | 33  | $C_w = 11.5 \mu\text{m}$    | —     |
| <i>Quercus laurifolia</i> | 6.72                       | 0.77                     | 22  | $C_w = 0.27 \cdot L + 4.57$ | 0.49* |
| <i>Quercus nigra</i>      | 7.29                       | 1.21                     | 27  | $C_w = 0.26 \cdot L + 3.55$ | 0.56* |
| <i>Taxodium distichum</i> | 9.79                       | 1.57                     | 20  | $C_w = 0.55 \cdot L + 1.52$ | 0.72* |

Species specific relations between pore length ( $L$ ) and guard cell width ( $C_w$ ) are used to derive pore depth ( $l$ ), based on the assumption that  $l$  is equal to  $C_w$  (1). The SD ( $\sigma$ ) and number of measurements ( $n$ ) are indicated, alongside the linear regressions and  $r^2$  values. Species specific regressions between  $C_w$  and  $L$  are highly significant ( $P < 0.0001$ , indicated by \*) with exception of *P. taeda*. We therefore derive  $l$  from these species specific regressions, except for *P. taeda* for which a constant value is applied. The average slope of these regressions is used to calculate lines of equal  $g_{\text{smax}}$  in Fig. 1A.

**Table S2. Species-specific model parameters**

| Species                   | $\lambda$ | LAI | $V_{\text{cmax}25}$ | $J_{\text{max}25}$ | $R_{\text{d}25}$ | Derived from            | $M_a$    | Ref. |
|---------------------------|-----------|-----|---------------------|--------------------|------------------|-------------------------|----------|------|
| <i>Acer rubrum</i>        | 72        | 5.5 | 75.0                | 94                 | 1.1              | Foliar N                | —        | 13   |
| <i>Ilex cassine</i>       | 134       | 5.5 | 55.5                | 79.2               | 0.8              | Foliar N                | 127 (15) | 14   |
| <i>Myrica cerifera</i>    | 99        | 5.5 | 62.5                | 89.1               | 0.9              | Foliar N                | 101 (35) | 14   |
| <i>Pinus elliotii</i>     | 244       | 2   | 60.9                | 86.9               | 0.9              | Foliar N                | —        | 14   |
| <i>Pinus taeda</i>        | 87        | 2   | 47.0                | 77.1               | 0.7              | A/C <sub>i</sub> curves | —        | 2    |
| <i>Quercus laurifolia</i> | 62        | 5.5 | 54.0                | 77.0               | 0.8              | Foliar N                | 102 (34) | 15   |
| <i>Quercus nigra</i>      | 58        | 5.5 | 64.8                | 92.4               | 1.0              | Foliar N                | 96 (10)  | 15   |
| <i>Taxodium distichum</i> | 55        | 3   | 30.0                | 49.2               | 0.5              | A/C <sub>i</sub> curves | —        | 2    |

Species specific model parameters. Lagrangian multiplier [ $\lambda$  ( $\mu\text{mol} \cdot \text{mol}^{-1}$ )], leaf area index [LAI (-)] and photosynthesis parameters  $V_{\text{cmax}25}$ ,  $J_{\text{max}25}$  and  $R_{\text{d}25}$  ( $\mu\text{mol} \cdot \text{m}^{-2} \cdot \text{s}^{-1}$ ) and how photosynthesis parameters are derived. If photosynthesis parameters are based on foliar nitrogen (N) concentrations on a leaf mass base, measurements of leaf mass with area [ $M_a$  ( $\text{g} \cdot \text{m}^{-2}$ )] and their SDs are indicated. LAI values for conifers (8, 9) are doubled in the model to account for their amphistomatic leaves.
